# Supplementary material for: Health-related quality of life in relation to symptomatic and radiographic definitions of knee osteoarthritis: data from Osteoarthritis Initiative (OAI) 4-year follow-up study
Source: Springer Nature journal article supplement (doi:10.1186/s12955-018-0979-7), 2018-07-31

**Additional file 2** Health-Related Quality of Life in Relation to Symptomatic and Radiographic Definitions of Knee Osteoarthritis:  
Data from Osteoarthritis Initiative (OAI) 4-Year Follow-Up Study

These figures report distribution of SF-6D disutility scores presented as histograms and normal curves.

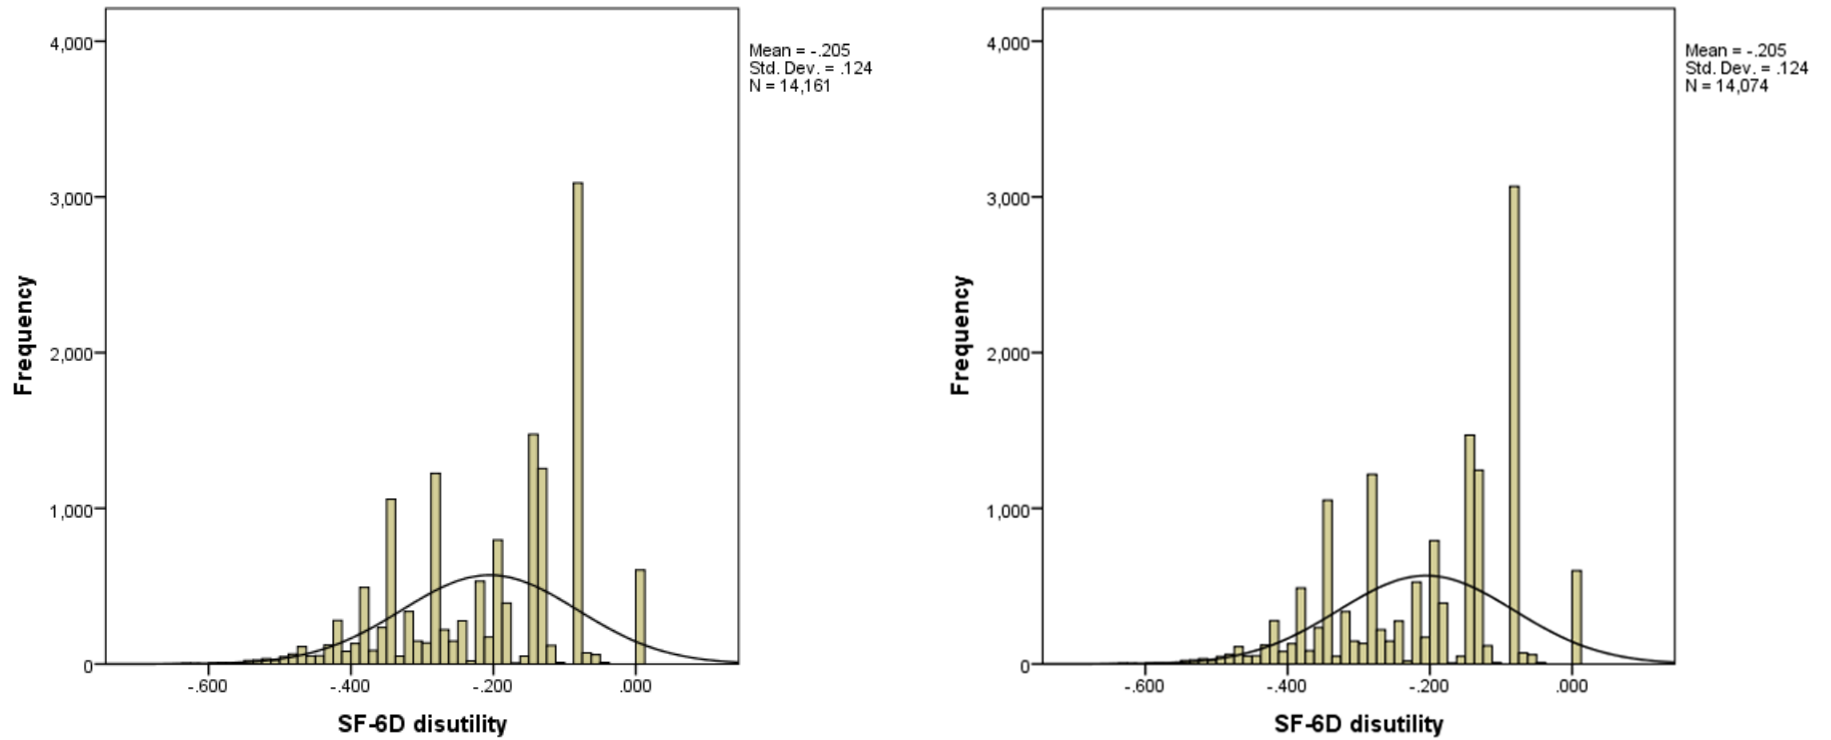

**Figure S1.** Histograms of SF-6D score frequencies and normal curves, radiographic (N=14,161) and symptomatic (N=14,074) definitions of knee OA

**Additional file 2** Health-Related Quality of Life in Relation to Symptomatic and Radiographic Definitions of Knee Osteoarthritis:  
Data from Osteoarthritis Initiative (OAI) 4-Year Follow-Up Study

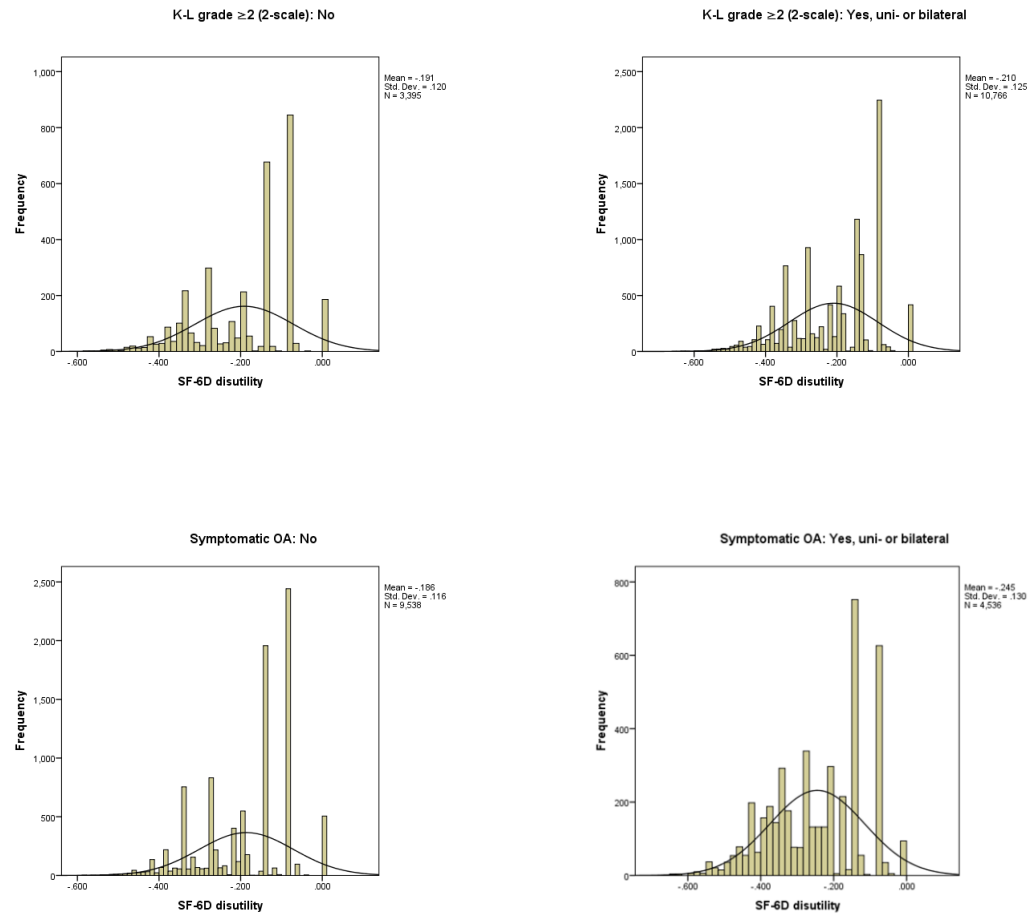

**Figure S2.** Histograms of SF-6D score frequencies and normal curves, radiographic (N=14,161) and symptomatic (N=14,074) definitions of knee OA

**Additional file 2** Health-Related Quality of Life in Relation to Symptomatic and Radiographic Definitions of Knee Osteoarthritis:  
Data from Osteoarthritis Initiative (OAI) 4-Year Follow-Up Study

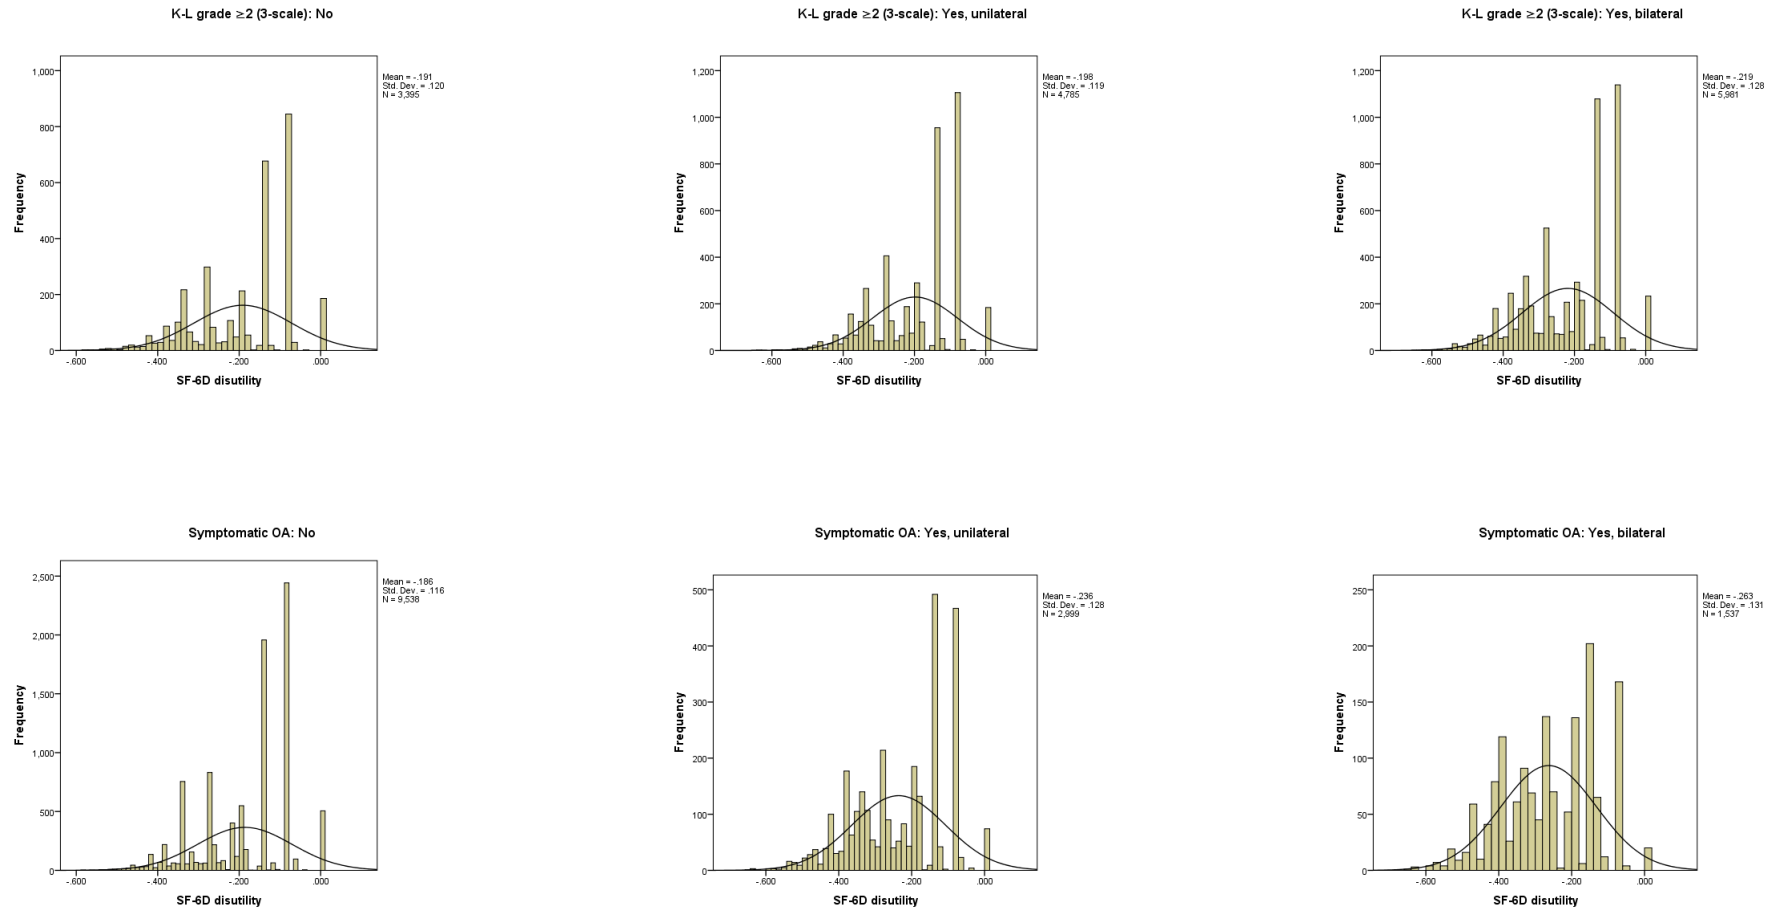

**Figure S3.** Histograms of SF-6D score frequencies and normal curves, radiographic (N=14,161) and symptomatic (N=14,074) definitions of knee OA

**Additional file 2** Health-Related Quality of Life in Relation to Symptomatic and Radiographic Definitions of Knee Osteoarthritis:  
Data from Osteoarthritis Initiative (OAI) 4-Year Follow-Up Study

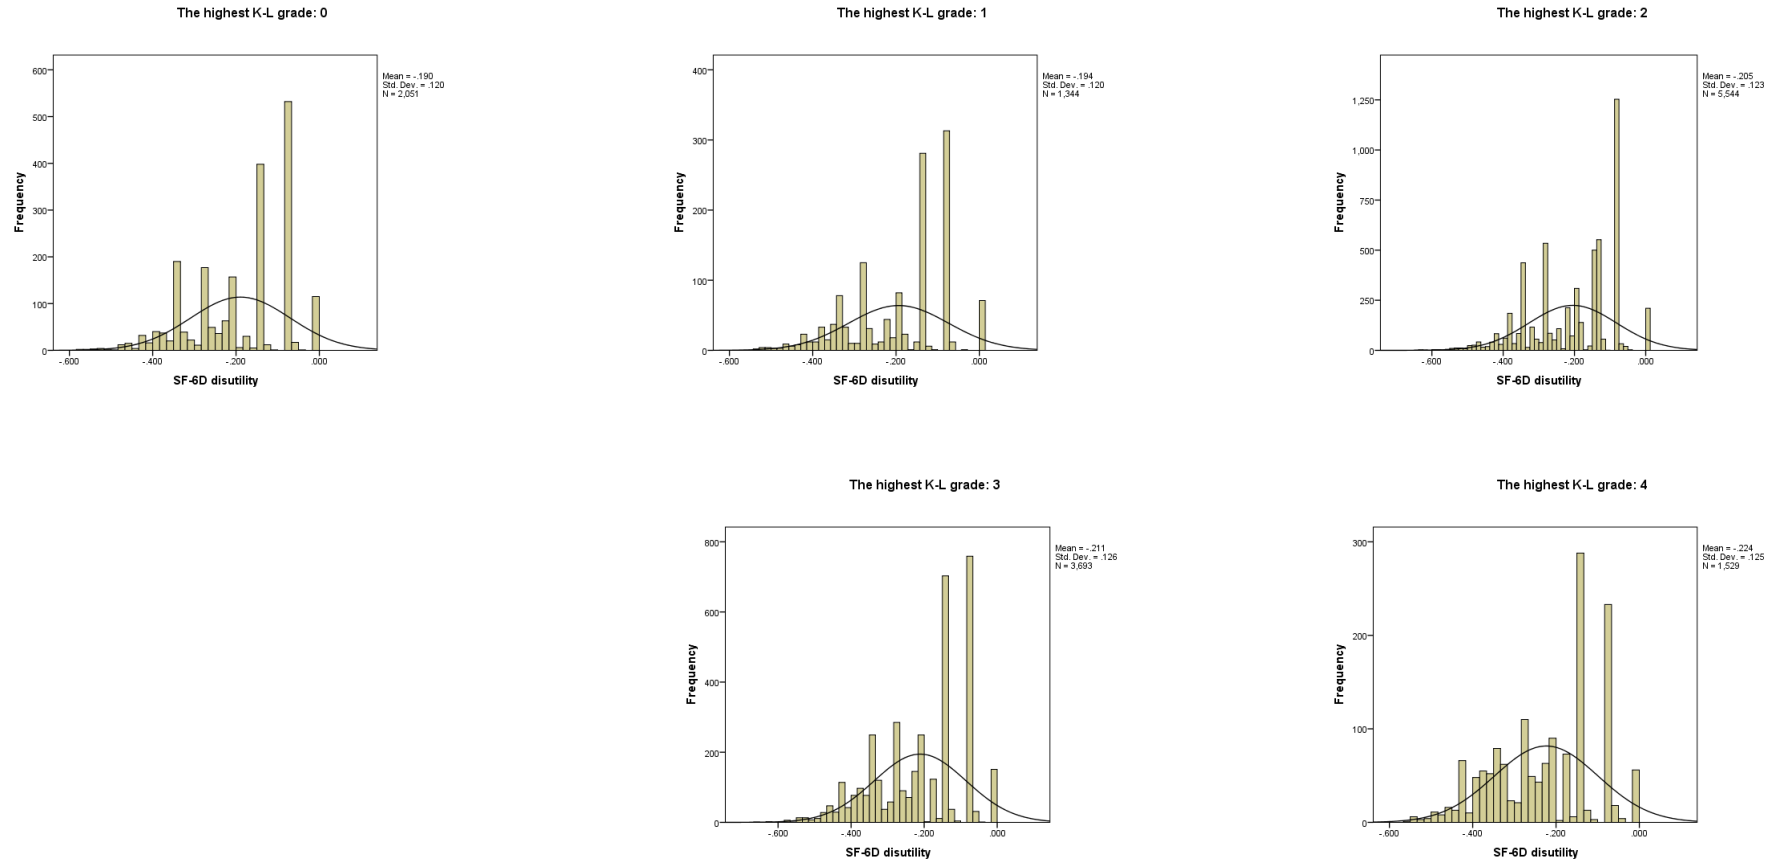

**Figure S4.** Histograms of SF-6D score frequencies and normal curves, radiographic definition of knee OA (N=14,161), the highest K-L grade

**Additional file 2** Health-Related Quality of Life in Relation to Symptomatic and Radiographic Definitions of Knee Osteoarthritis:  
Data from Osteoarthritis Initiative (OAI) 4-Year Follow-Up Study

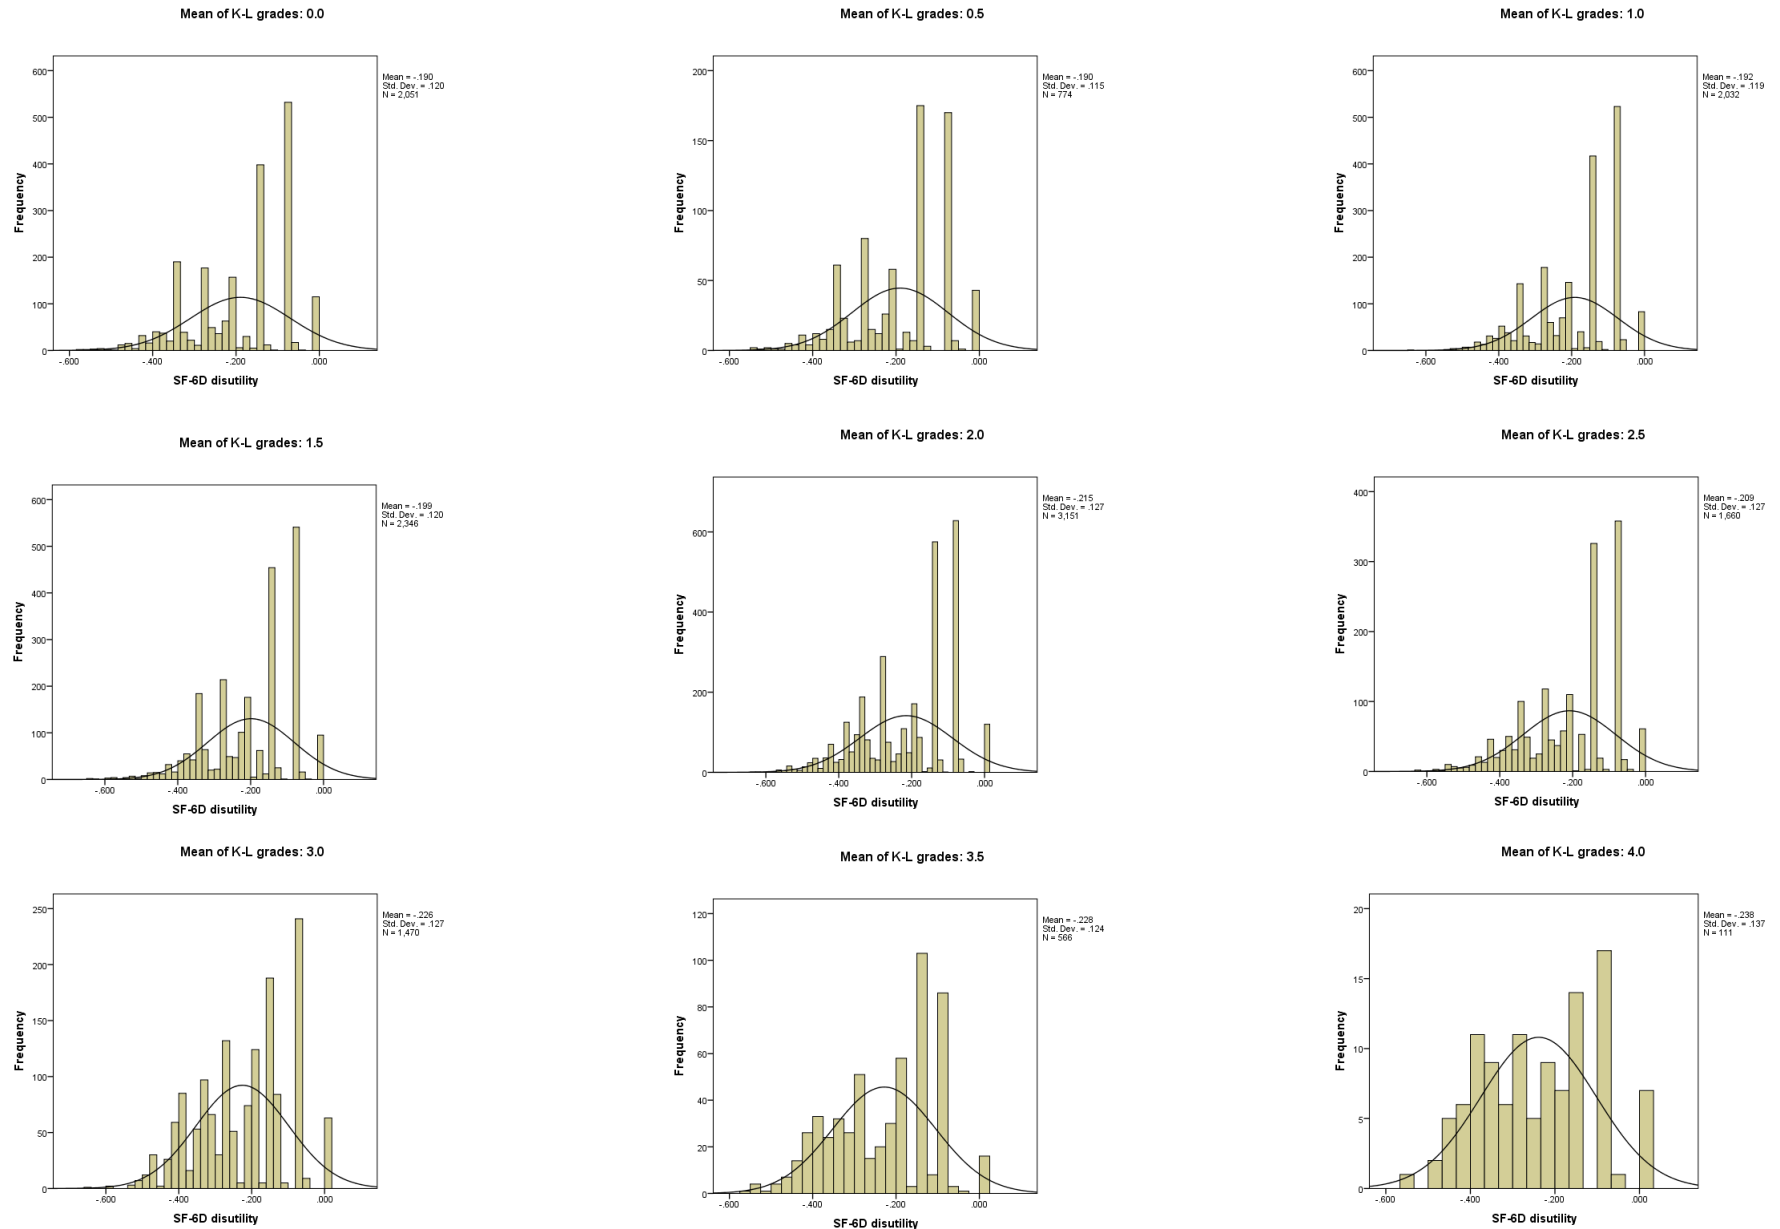

**Figure S5.** Histograms of SF-6D score frequencies and normal curves, radiographic definition of knee OA (N=14,161), mean of K-L grades

**Additional file 2** Health-Related Quality of Life in Relation to Symptomatic and Radiographic Definitions of Knee Osteoarthritis:  
Data from Osteoarthritis Initiative (OAI) 4-Year Follow-Up Study

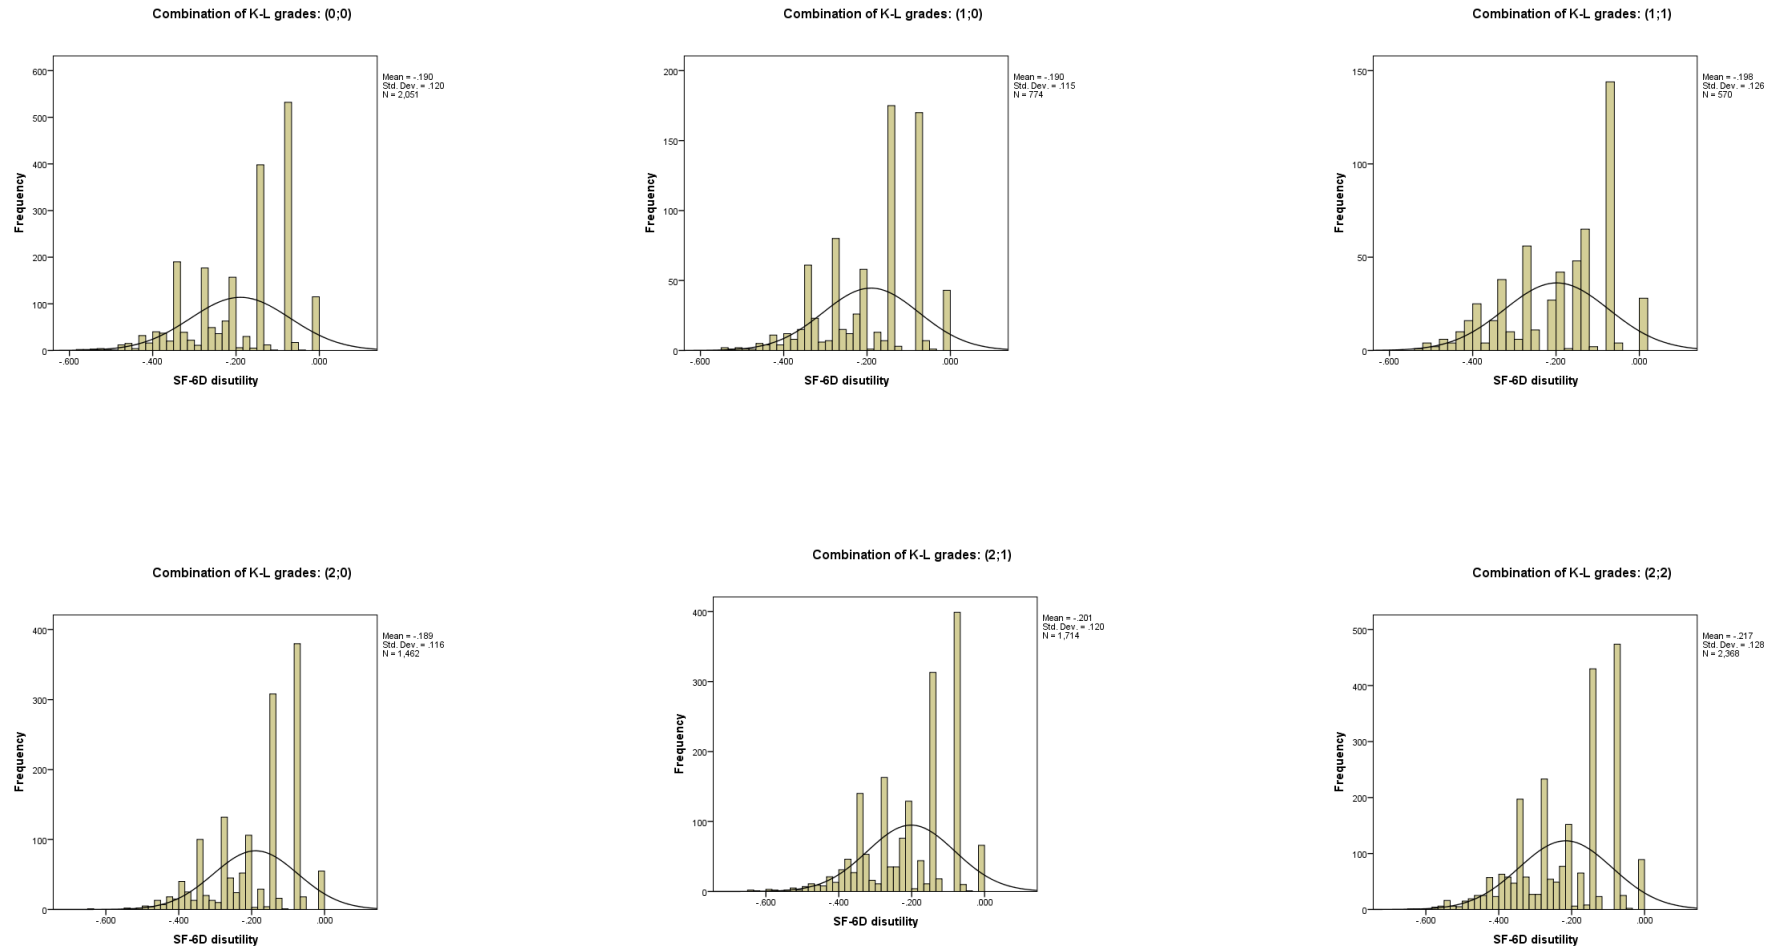

**Figure S6.** Histograms of SF-6D score frequencies and normal curves, radiographic definition of knee OA (N=14,161), combination of K-L grades (figure continues)

**Additional file 2** Health-Related Quality of Life in Relation to Symptomatic and Radiographic Definitions of Knee Osteoarthritis:  
Data from Osteoarthritis Initiative (OAI) 4-Year Follow-Up Study

Combination of K-L grades: (3;0)

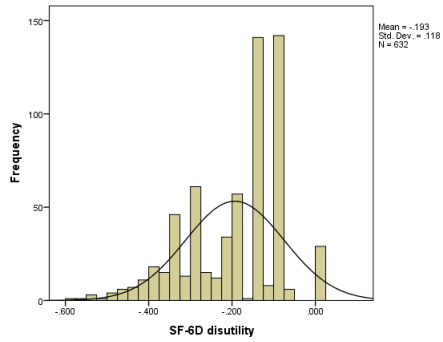

Combination of K-L grades: (3;1)

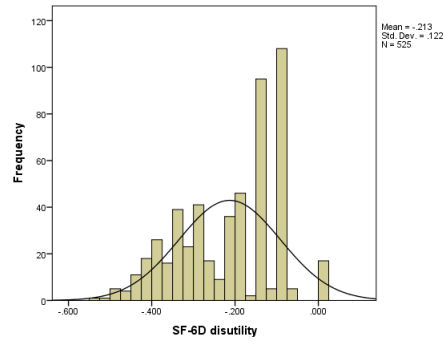

Combination of K-L grades: (3;2)

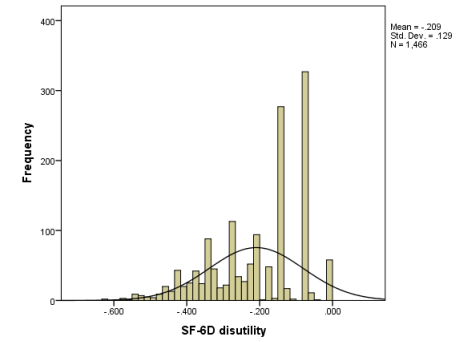

Combination of K-L grades: (3;3)

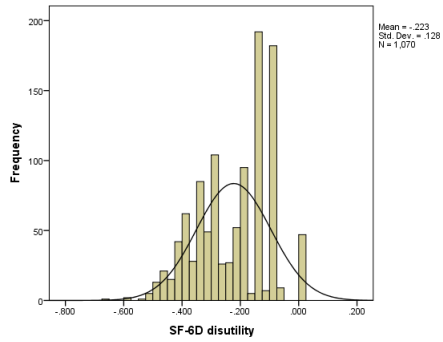

Combination of K-L grades: (4;0)

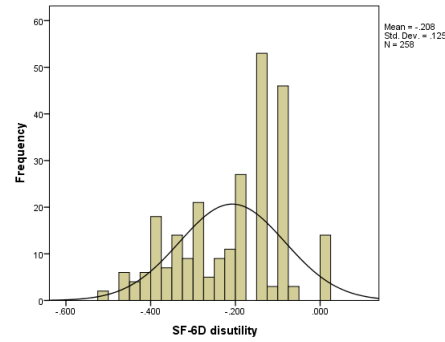

Combination of K-L grades: (4;1)

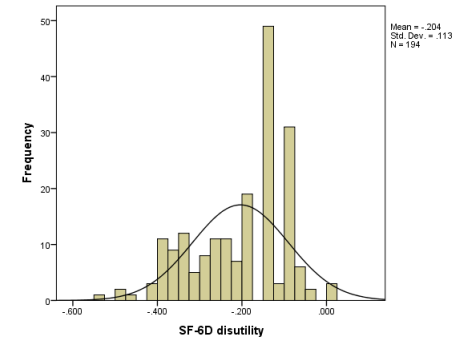

Combination of K-L grades: (4;2)

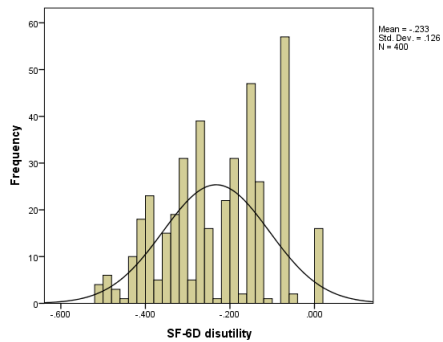

Combination of K-L grades: (4;3)

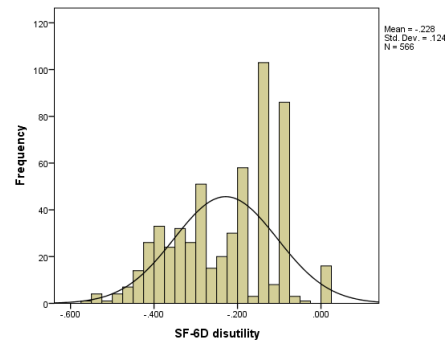

Combination of K-L grades: (4;4)

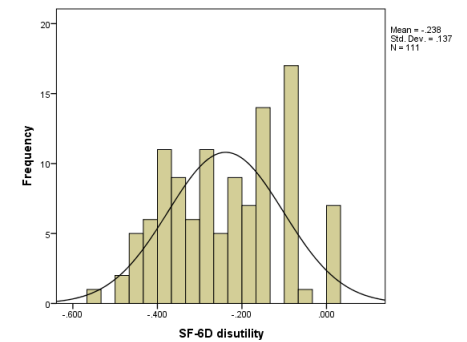

Supplement: MOESM2 [file 15991850]
