# Supplementary material for: Health-related quality of life in relation to symptomatic and radiographic definitions of knee osteoarthritis: data from Osteoarthritis Initiative (OAI) 4-year follow-up study
Source: Springer Nature journal article supplement (doi:10.1186/s12955-018-0979-7), 2018-07-31
Supplement: MOESM1 [file 15991850]

**Additional file 1** Health-Related Quality of Life in Relation to Symptomatic and Radiographic Definitions of Knee Osteoarthritis: Data from Osteoarthritis Initiative (OAI) 4-Year Follow-Up Study

This table reports specific OAI datasets, from where data for each subject were collected and, applied in analyses.

**Table S1** OAI datasets analysed during the current study are available from the Osteoarthritis Initiative (OAI), <http://www.oai.ucsf.edu/>.

**OAI Dataset Label\***

---

|                   |
|-------------------|
| Enrollees_SAS     |
| Outcomes99_SAS    |
| AllClinical01_SAS |
| AllClinical03_SAS |
| AllClinical05_SAS |
| AllClinical06_SAS |
| kXR_SQ_BU00_SAS   |
| kXR_SQ_BU01_SAS   |
| kXR_SQ_BU03_SAS   |
| kXR_SQ_BU05_SAS   |
| SubjectChar06_SAS |

---

\*Data from baseline and follow-up visits at 12, 24, 36 and 48 months were applied in the study
