# Supplementary material for: Health-related quality of life in relation to symptomatic and radiographic definitions of knee osteoarthritis: data from Osteoarthritis Initiative (OAI) 4-year follow-up study
Source: Springer Nature journal article supplement (doi:10.1186/s12955-018-0979-7), 2018-07-31
Supplement: MOESM3 [file 15991850]

**Additional file 3** Health-Related Quality of Life in Relation to Symptomatic and Radiographic Definitions of Knee Osteoarthritis: Data from Osteoarthritis Initiative (OAI) 4-Year Follow-Up Study

These tables report number and characteristics of participants eligible for data analyses and prevalence of knee OA according to different definitions during follow-up.

**Table S2** Characteristics of participants eligible for data analyses \*

| <b>Variable</b>                            | <b>Baseline</b> | <b>Year 1</b> | <b>Year 2</b> | <b>Year 3</b> | <b>Year 4</b> |
|--------------------------------------------|-----------------|---------------|---------------|---------------|---------------|
| <b>Participants</b>                        |                 |               |               |               |               |
| Participated study visit                   | 4796            | 4496          | 4324          | 4270          | 4256          |
| K-L grade available for both knees         | 4505 (93.9)     | 2596 (57.7)   | 2447 (56.6)   | 2354 (55.1)   | 3610 (84.8)   |
| Eligible for analyses [1]                  | 4278 (89.2)     | 2424 (53.9)   | 2249 (52.0)   | 2059 (48.2)   | 3151 (74.0)   |
| Eligible for analyses [2]                  | 4248 (88.6)     | 2409 (53.6)   | 2230 (51.6)   | 2053 (48.1)   | 3134 (73.6)   |
| <b>Age, years</b>                          |                 |               |               |               |               |
| 45–54                                      | 1264 (29.5)     | 491 (20.3)    | 371 (16.5)    | 294 (14.3)    | 461 (14.6)    |
| 55–64                                      | 1393 (32.6)     | 783 (32.3)    | 766 (34.1)    | 687 (33.4)    | 1138 (36.1)   |
| >65                                        | 1621 (37.9)     | 1150 (47.4)   | 1112 (49.4)   | 1078 (52.4)   | 1552 (49.3)   |
| <b>Gender</b>                              |                 |               |               |               |               |
| Male                                       | 1782 (41.7)     | 1020 (42.1)   | 951 (42.3)    | 868 (42.2)    | 1356 (43.0)   |
| Female                                     | 2496 (58.3)     | 1404 (57.9)   | 1298 (57.7)   | 1191 (57.8)   | 1795 (57.0)   |
| <b>Race</b>                                |                 |               |               |               |               |
| White or Caucasian                         | 3458 (80.8)     | 1927 (79.5)   | 1803 (80.2)   | 1658 (80.5)   | 2616 (83.0)   |
| Other                                      | 820 (19.2)      | 497 (20.5)    | 446 (19.8)    | 401 (19.5)    | 535 (17.0)    |
| <b>Education †</b>                         |                 |               |               |               |               |
| Tertiary                                   | 1336 (31.2)     | 730 (30.1)    | 694 (30.9)    | 634 (30.8)    | 1011 (32.1)   |
| Secondary                                  | 1277 (29.9)     | 713 (29.4)    | 663 (29.5)    | 632 (30.7)    | 1008 (32.0)   |
| None / Primary                             | 1665 (38.9)     | 981 (40.5)    | 892 (39.7)    | 793 (38.5)    | 1132 (35.9)   |
| <b>Living status (number of persons) ‡</b> |                 |               |               |               |               |
| Live alone                                 | 928 (21.7)      | 549 (22.6)    | 499 (22.2)    | 490 (23.8)    | 714 (22.7)    |
| Living with someone else                   | 3350 (78.3)     | 1875 (77.4)   | 1750 (77.8)   | 1569 (76.2)   | 2437 (77.3)   |
| <b>BMI, kg/m<sup>2</sup></b>               |                 |               |               |               |               |
| <25                                        | 1040 (24.3)     | 453 (18.7)    | 426 (18.9)    | 387 (18.8)    | 786 (24.9)    |
| 25 to <30                                  | 1690 (39.5)     | 950 (39.2)    | 871 (38.7)    | 849 (41.2)    | 1242 (39.4)   |
| 30 to <35                                  | 1122 (26.2)     | 703 (29.0)    | 670 (29.8)    | 576 (28.0)    | 788 (25.0)    |
| ≥35                                        | 426 (10.0)      | 318 (13.1)    | 282 (12.5)    | 247 (12.0)    | 335 (10.6)    |
| <b>Comorbidities §</b>                     |                 |               |               |               |               |
| score 0                                    | 3254 (76.1)     | 1810 (74.7)   | 1603 (71.3)   | 1505 (73.1)   | 2234 (70.9)   |
| score >0                                   | 1024 (23.9)     | 614 (25.3)    | 646 (28.7)    | 554 (26.9)    | 917 (29.1)    |
| <b>Physical activity, PASE ¶</b>           |                 |               |               |               |               |
| 238–580                                    | 798 (18.7)      | 375 (15.5)    | 302 (13.4)    | 279 (13.6)    | 535 (17.0)    |
| 176–237                                    | 853 (19.9)      | 480 (19.8)    | 422 (18.8)    | 395 (19.2)    | 584 (18.5)    |
| 135–175                                    | 866 (20.2)      | 457 (18.9)    | 466 (20.7)    | 375 (18.2)    | 596 (18.9)    |
| 91–134                                     | 871 (20.4)      | 505 (20.8)    | 517 (23.0)    | 473 (23.0)    | 671 (21.3)    |
| 0–90                                       | 890 (20.8)      | 607 (25.0)    | 542 (24.1)    | 537 (26.1)    | 765 (24.3)    |
| <b>Smoking status   </b>                   |                 |               |               |               |               |
| Never                                      | 1977 (46.2)     | 1116 (46.0)   | 1023 (45.5)   | 925 (44.9)    | 1587 (50.4)   |
| Former                                     | 1908 (44.6)     | 1105 (45.6)   | 1034 (46.0)   | 956 (46.4)    | 1351 (42.9)   |
| Current                                    | 393 (9.2)       | 203 (8.4)     | 192 (8.5)     | 178 (8.6)     | 213 (6.8)     |
| <b>Knee injuries</b>                       |                 |               |               |               |               |

**Additional file 3** Health-Related Quality of Life in Relation to Symptomatic and Radiographic Definitions of Knee Osteoarthritis: Data from Osteoarthritis Initiative (OAI) 4-Year Follow-Up Study

|                                            |                   |                   |                   |                   |                   |
|--------------------------------------------|-------------------|-------------------|-------------------|-------------------|-------------------|
| No                                         | 2424 (56.7)       | 1196 (49.3)       | 1070 (47.6)       | 934 (45.4)        | 1593 (50.6)       |
| Yes                                        | 1854 (43.3)       | 1228 (50.7)       | 1179 (52.4)       | 1125 (54.6)       | 1558 (49.4)       |
| <b>Knee surgical history</b>               |                   |                   |                   |                   |                   |
| No                                         | 3341 (78.1)       | 1697 (70.0)       | 1555 (69.1)       | 1398 (67.9)       | 2383 (75.6)       |
| Yes                                        | 937 (21.9)        | 727 (30.0)        | 694 (30.9)        | 661 (32.1)        | 768 (24.4)        |
| <b>Disutility (SF-6D) score, mean (SD)</b> | -0.199<br>(0.120) | -0.210<br>(0.125) | -0.208<br>(0.126) | -0.209<br>(0.124) | -0.205<br>(0.126) |

Abbreviations: BMI Body Mass Index; Comorbidites Charlson comorbidity index score; K-L Kellgren-Lawrence radiographic system; PASE Physical Activity Scale for the Elderly; SD Standard Deviation

\* Values are presented as N (%) unless stated otherwise

[1] Radiographic definition of knee OA

[2] Symptomatic definition of knee OA (pain questionnaire required)

† The highest grade of school completed: tertiary (graduate degree), secondary (college graduate or some graduate school), and primary/none level (less than college)

‡ OAI data covered living status at baseline and year 3 follow-up visit. Missing data at year 1, 2 and 4 was imputed with the information available from the baseline and year 3 visit.

§ OAI data covered comorbid conditions at baseline, year 2 and year 4 follow-up visits. Missing data at year 1 and 3 was imputed with the information available from the baseline and year 2 visit, respectively.

¶ Physical activity PASE score quintiles (higher scores indicate greater physical activity)

|| OAI data covered smoking status at baseline and year 4 follow-up visit. Missing data at year 1, 2 and 3 was imputed with the information available from the baseline visit.

**Table S3** Prevalence of knee OA according to different definitions during follow-up, N (%)

| <b>Variable</b>                                | <b>Baseline</b> | <b>Year 1</b> | <b>Year 2</b> | <b>Year 3</b> | <b>Year 4</b> |
|------------------------------------------------|-----------------|---------------|---------------|---------------|---------------|
| <b>Participants</b>                            | 4278            | 2424          | 2249          | 2059          | 3151          |
| <b>Symptomatic OA status * (2-scale)</b>       |                 |               |               |               |               |
| No                                             | 3134 (73.8)     | 1457 (60.5)   | 1338 (60.0)   | 1241 (60.4)   | 2368 (75.6)   |
| Yes, uni- or bilateral                         | 1114 (26.2)     | 952 (39.5)    | 892 (40.0)    | 812 (39.6)    | 766 (24.4)    |
| Missing †                                      | 30              | 15            | 19            | 6             | 17            |
| <b>Symptomatic OA status * (3-scale)</b>       |                 |               |               |               |               |
| No                                             | 3134 (73.8)     | 1457 (60.5)   | 1338 (60.0)   | 1241 (60.4)   | 2368 (75.6)   |
| Yes, unilateral                                | 762 (17.9)      | 642 (26.7)    | 596 (26.7)    | 508 (24.7)    | 491 (15.7)    |
| Yes, bilateral                                 | 352 (8.3)       | 310 (12.9)    | 296 (13.3)    | 304 (14.8)    | 275 (8.8)     |
| Missing †                                      | 30              | 15            | 19            | 6             | 17            |
| <b>K-L grade <math>\geq 2</math> (2-scale)</b> |                 |               |               |               |               |
| No                                             | 1860 (43.5)     | 120 (5.0)     | 84 (3.7)      | 39 (1.9)      | 1292 (41.0)   |
| Yes, uni- or bilateral                         | 2418 (56.5)     | 2304 (95.0)   | 2165 (96.3)   | 2020 (98.1)   | 1859 (59.0)   |
| <b>K-L grade <math>\geq 2</math> (3-scale)</b> |                 |               |               |               |               |
| No                                             | 1860 (43.5)     | 120 (5.0)     | 84 (3.7)      | 39 (1.9)      | 1292 (41.0)   |
| Yes, unilateral                                | 1112 (26.0)     | 1019 (42.0)   | 953 (42.4)    | 884 (42.9)    | 817 (25.9)    |
| Yes, bilateral                                 | 1306 (30.5)     | 1285 (53.0)   | 1212 (53.9)   | 1136 (55.2)   | 1042 (33.1)   |
| <b>The highest K-L grade</b>                   |                 |               |               |               |               |
| 0                                              | 1199 (28.0)     | 32 (1.3)      | 17 (0.8)      | 6 (0.3)       | 797 (25.3)    |
| 1                                              | 661 (15.5)      | 88 (3.6)      | 67 (3.0)      | 33 (1.6)      | 495 (15.7)    |
| 2                                              | 1288 (30.1)     | 1182 (48.8)   | 1103 (49.0)   | 1019 (49.5)   | 952 (30.2)    |
| 3                                              | 841 (19.7)      | 802 (33.1)    | 745 (33.1)    | 695 (33.8)    | 610 (19.4)    |
| 4                                              | 289 (6.8)       | 320 (13.2)    | 317 (14.1)    | 306 (14.9)    | 297 (9.4)     |
| <b>Mean of K-L grades</b>                      |                 |               |               |               |               |
| 0.0                                            | 1199 (28.0)     | 32 (1.3)      | 17 (0.8)      | 6 (0.3)       | 797 (25.3)    |
| 0.5                                            | 383 (9.0)       | 44 (1.8)      | 36 (1.6)      | 19 (0.9)      | 292 (9.3)     |
| 1.0                                            | 612 (14.3)      | 347 (14.3)    | 322 (14.3)    | 288 (14.0)    | 463 (14.7)    |
| 1.5                                            | 550 (12.9)      | 499 (20.6)    | 467 (20.8)    | 437 (21.2)    | 393 (12.5)    |
| 2.0                                            | 728 (17.0)      | 682 (28.1)    | 625 (27.8)    | 577 (28.0)    | 539 (17.1)    |
| 2.5                                            | 391 (9.1)       | 364 (15.0)    | 337 (15.0)    | 298 (14.5)    | 270 (8.6)     |
| 3.0                                            | 313 (7.3)       | 327 (13.5)    | 294 (13.1)    | 278 (13.5)    | 258 (8.2)     |
| 3.5                                            | 100 (2.3)       | 117 (4.8)     | 127 (5.6)     | 122 (5.9)     | 100 (3.2)     |
| 4.0                                            | 2 (0.0)         | 12 (0.5)      | 24 (1.1)      | 34 (1.7)      | 39 (1.2)      |
| <b>Combination of K-L grades</b>               |                 |               |               |               |               |
| (0;0)                                          | 1199 (28.0)     | 32 (1.3)      | 17 (0.8)      | 6 (0.3)       | 797 (25.3)    |
| (1;0)                                          | 383 (9.0)       | 44 (1.8)      | 36 (1.6)      | 19 (0.9)      | 292 (9.3)     |
| (1;1)                                          | 278 (6.5)       | 44 (1.8)      | 31 (1.4)      | 14 (0.7)      | 203 (6.4)     |
| (2;0)                                          | 334 (7.8)       | 303 (12.5)    | 291 (12.9)    | 274 (13.3)    | 260 (8.3)     |
| (2;1)                                          | 403 (9.4)       | 368 (15.2)    | 344 (15.3)    | 312 (15.2)    | 287 (9.1)     |
| (2;2)                                          | 551 (12.9)      | 511 (21.1)    | 468 (20.8)    | 433 (21.0)    | 405 (12.9)    |
| (3;0)                                          | 147 (3.4)       | 131 (5.4)     | 123 (5.5)     | 125 (6.1)     | 106 (3.4)     |
| (3;1)                                          | 123 (2.9)       | 114 (4.7)     | 106 (4.7)     | 97 (4.7)      | 85 (2.7)      |
| (3;2)                                          | 340 (7.9)       | 318 (13.1)    | 299 (13.3)    | 269 (13.1)    | 240 (7.6)     |
| (3;3)                                          | 231 (5.4)       | 239 (9.9)     | 217 (9.6)     | 204 (9.9)     | 179 (5.7)     |

**Additional file 3** Health-Related Quality of Life in Relation to Symptomatic and Radiographic Definitions of Knee Osteoarthritis: Data from Osteoarthritis Initiative (OAI) 4-Year Follow-Up Study

|       |           |           |           |           |           |
|-------|-----------|-----------|-----------|-----------|-----------|
| (4;0) | 54 (1.3)  | 57 (2.4)  | 51 (2.3)  | 47 (2.3)  | 49 (1.6)  |
| (4;1) | 51 (1.2)  | 46 (1.9)  | 38 (1.7)  | 29 (1.4)  | 30 (1.0)  |
| (4;2) | 82 (1.9)  | 88 (3.6)  | 77 (3.4)  | 74 (3.6)  | 79 (2.5)  |
| (4;3) | 100 (2.3) | 117 (4.8) | 127 (5.6) | 122 (5.9) | 100 (3.2) |
| (4;4) | 2 (0.0)   | 12 (0.5)  | 24 (1.1)  | 34 (1.7)  | 39 (1.2)  |

\* K-L grade  $\geq 2$  and knee pain on more than half the days during past month in the same knee

† Pain questionnaire required for the definition of symptomatic knee OA

**Table S4** Number of participants stratified according to number of observations available for analyses, N (%)

| <b>Observations, N</b> | <b>Symptomatic knee OA definition*</b> | <b>Radiographic knee OA definition</b> |
|------------------------|----------------------------------------|----------------------------------------|
| <b>5</b>               | 1504 (34.3)                            | 1547 (35.3)                            |
| <b>4</b>               | 499 (11.4)                             | 466 (10.6)                             |
| <b>3</b>               | 338 (7.7)                              | 337 (7.7)                              |
| <b>2</b>               | 1501 (34.2)                            | 1513 (34.5)                            |
| <b>1</b>               | 542 (12.4)                             | 525 (12.0)                             |
| <b>In total</b>        | <b>4384 (100.0)</b>                    | <b>4388 (100.0)</b>                    |

\* K-L grade  $\geq 2$  and knee pain on more than half the days during past month in the same knee (pain questionnaire required for the definition of symptomatic knee OA)
