# Supplementary material for: Health-related quality of life in relation to symptomatic and radiographic definitions of knee osteoarthritis: data from Osteoarthritis Initiative (OAI) 4-year follow-up study
Source: Springer Nature journal article supplement (doi:10.1186/s12955-018-0979-7), 2018-07-31
Supplement: MOESM4 [file 15991850]

**Additional file 4** Health-Related Quality of Life in Relation to Symptomatic and Radiographic Definitions of Knee Osteoarthritis: Data from Osteoarthritis Initiative (OAI) 4-Year Follow-Up Study

These tables report estimated marginal means of SF-6D-disutility scores, the parameter estimates, and 95% confidence intervals (CI) from GEE-analyses.

**Table S5** Estimated marginal means of SF-6D-disutility scores and 95% confidence intervals (CI) from GEE-analyses

|                                          | Mean (95% CI)          | p       |
|------------------------------------------|------------------------|---------|
| <b>Symptomatic OA status † (2-scale)</b> |                        |         |
| No                                       | -0.220 (-0.226;-0.215) |         |
| Yes, uni- or bilateral                   | -0.246 (-0.252;-0.239) | <0.001* |
| <b>Symptomatic OA status † (3-scale)</b> |                        |         |
| No                                       | -0.220 (-0.226;-0.214) |         |
| Yes, unilateral                          | -0.244 (-0.250;-0.237) | <0.001* |
| Yes, bilateral                           | -0.250 (-0.258;-0.242) | <0.001* |
| <b>K-L grade ≥2 (2-scale)</b>            |                        |         |
| No                                       | -0.225 (-0.232;-0.218) |         |
| Yes, uni- or bilateral                   | -0.231 (-0.237;-0.225) | 0.040*  |
| <b>K-L grade ≥2 (3-scale)</b>            |                        |         |
| No                                       | -0.224 (-0.231;-0.216) |         |
| Yes, unilateral                          | -0.225 (-0.231;-0.218) | 0.774   |
| Yes, bilateral                           | -0.237 (-0.243;-0.230) | <0.001* |
| <b>The highest K-L grade</b>             |                        |         |
| 0                                        | -0.223 (-0.231;-0.215) |         |
| 1                                        | -0.225 (-0.233;-0.216) | 0.706   |
| 2                                        | -0.226 (-0.233;-0.220) | 0.349   |
| 3                                        | -0.231 (-0.238;-0.224) | 0.055   |
| 4                                        | -0.249 (-0.259;-0.240) | <0.001* |
| <b>Mean of K-L grades</b>                |                        |         |
| 0.0                                      | -0.222 (-0.230;-0.213) |         |
| 0.5                                      | -0.224 (-0.234;-0.214) | 0.651   |
| 1.0                                      | -0.218 (-0.226;-0.209) | 0.375   |
| 1.5                                      | -0.224 (-0.232;-0.216) | 0.554   |
| 2.0                                      | -0.234 (-0.242;-0.227) | 0.004*  |
| 2.5                                      | -0.230 (-0.239;-0.221) | 0.118   |
| 3.0                                      | -0.241 (-0.250;-0.231) | 0.001*  |
| 3.5                                      | -0.258 (-0.270;-0.246) | <0.001* |
| 4.0                                      | -0.262 (-0.284;-0.240) | 0.001*  |
| <b>Combination of K-L grades</b>         |                        |         |
| (0;0)                                    | -0.222 (-0.230;-0.213) |         |
| (1;0)                                    | -0.224 (-0.234;-0.214) | 0.674   |
| (1;1)                                    | -0.221 (-0.234;-0.209) | 0.969   |
| (2;0)                                    | -0.215 (-0.225;-0.206) | 0.217   |
| (2;1)                                    | -0.225 (-0.234;-0.216) | 0.476   |
| (2;2)                                    | -0.233 (-0.241;-0.225) | 0.015*  |
| (3;0)                                    | -0.224 (-0.237;-0.211) | 0.741   |
| (3;1)                                    | -0.231 (-0.244;-0.218) | 0.196   |
| (3;2)                                    | -0.229 (-0.239;-0.220) | 0.152   |
| (3;3)                                    | -0.240 (-0.250;-0.229) | 0.003*  |
| (4;0)                                    | -0.250 (-0.271;-0.229) | 0.010*  |

**Additional file 4** Health-Related Quality of Life in Relation to Symptomatic and Radiographic Definitions of Knee Osteoarthritis: Data from Osteoarthritis Initiative (OAI) 4-Year Follow-Up Study

|       |                        |         |
|-------|------------------------|---------|
| (4;1) | -0.232 (-0.256;-0.209) | 0.375   |
| (4;2) | -0.242 (-0.257;-0.227) | 0.012*  |
| (4;3) | -0.258 (-0.270;-0.246) | <0.001* |
| (4;4) | -0.262 (-0.284;-0.240) | 0.001*  |

\* The mean difference is significant at the  $p < 0.05$  level, p-values are presented in comparison to reference groups (“No OA” or “K-L grade 0”)

† K-L-grade  $\geq 2$  and knee pain on more than half the days during past month in the same knee

**Table S6** Parameter estimates from GEE-analyses, symptomatic OA status (2-scale)

| Parameter                                | Category                 | B      | 95% CI        | p       |
|------------------------------------------|--------------------------|--------|---------------|---------|
| <b>Symptomatic OA status † (2-scale)</b> | Yes, uni- or bilateral   | -0.025 | -0.029;-0.021 | <0.001* |
|                                          | No                       | 1.0    |               |         |
| <b>Age, years</b>                        | >65                      | 0.018  | 0.012;0.025   | <0.001* |
|                                          | 55-64                    | 0.007  | 0.001;0.013   | 0.022*  |
|                                          | 45-54                    | 1.0    |               |         |
| <b>Gender</b>                            | Female                   | -0.013 | -0.019;-0.006 | <0.001* |
|                                          | Male                     | 1.0    |               |         |
| <b>Race</b>                              | Other                    | -0.012 | -0.021;-0.004 | 0.005*  |
|                                          | White or Caucasian       | 1.0    |               |         |
| <b>Education ‡</b>                       | None / Primary           | -0.034 | -0.041;-0.027 | <0.001* |
|                                          | Secondary                | -0.011 | -0.018;-0.004 | 0.002*  |
|                                          | Tertiary                 | 1.0    |               |         |
| <b>Living status (number of persons)</b> | Living with someone else | 0.015  | 0.009;0.022   | <0.001* |
|                                          | Live alone               | 1.0    |               |         |
| <b>BMI, kg/m2</b>                        | ≥35                      | -0.031 | -0.040;-0.022 | <0.001* |
|                                          | 30 to <35                | -0.015 | -0.022;-0.008 | <0.001* |
|                                          | 25 to <30                | -0.003 | -0.009;0.003  | 0.365   |
|                                          | <25                      | 1.0    |               |         |
| <b>Comorbidities</b>                     | score >0                 | -0.023 | -0.028;-0.018 | <0.001* |
|                                          | score 0                  | 1.0    |               |         |
| <b>Physical activity, PASE §</b>         | 0-90                     | -0.026 | -0.032;-0.020 | <0.001* |
|                                          | 91-134                   | -0.013 | -0.019;-0.008 | <0.001* |
|                                          | 135-175                  | -0.004 | -0.009;0.002  | 0.210   |
|                                          | 176-237                  | -0.003 | -0.008;0.002  | 0.292   |
|                                          | 238-580                  | 1.0    |               |         |
| <b>Smoking status</b>                    | Current                  | -0.030 | -0.041;-0.020 | <0.001* |
|                                          | Former                   | -0.005 | -0.011;0.001  | 0.074   |
|                                          | Never                    | 1.0    |               |         |
| <b>Knee injuries</b>                     | Yes                      | -0.020 | -0.026;-0.014 | <0.001* |
|                                          | No                       | 1.0    |               |         |
| <b>Knee surgical history</b>             | Yes                      | 0.005  | -0.002;0.012  | 0.169   |
|                                          | No                       | 1.0    |               |         |

\*The difference is significant at the p<0.05 level

† K-L grade ≥2 and knee pain on more than half the days during past month in the same knee

‡ The highest grade of school completed: tertiary (graduate degree), secondary (college graduate or some graduate school), and primary/none level (less than college)

§ Physical activity PASE score quintiles (higher scores indicate greater physical activity)

**Table S7** Parameter estimates from GEE-analyses, symptomatic OA status (3-scale)

| <b>Parameter</b>                           |                          | <b>B</b> | <b>95% CI</b> | <b>p</b> |
|--------------------------------------------|--------------------------|----------|---------------|----------|
| <b>Symptomatic OA status † (3-scale)</b>   | Yes, unilateral          | -0.030   | -0.036;-0.023 | <0.001*  |
|                                            | Yes, bilateral           | -0.024   | -0.028;-0.019 | <0.001*  |
|                                            | No                       | 1.0      |               |          |
| <b>Age, years</b>                          | >65                      | 0.018    | 0.012;0.025   | <0.001*  |
|                                            | 55-64                    | 0.007    | 0.001;0.013   | 0.022*   |
|                                            | 45-54                    | 1.0      |               |          |
| <b>Gender</b>                              | Female                   | -0.012   | -0.019;-0.006 | <0.001*  |
|                                            | Male                     | 1.0      |               |          |
| <b>Race</b>                                | Other                    | -0.012   | -0.021;-0.004 | 0.006*   |
|                                            | White or Caucasian       | 1.0      |               |          |
| <b>Education ‡</b>                         | None / Primary           | -0.034   | -0.041;-0.027 | <0.001*  |
|                                            | Secondary                | -0.011   | -0.018;-0.004 | 0.002*   |
|                                            | Tertiary                 | 1.0      |               |          |
| <b>Living status (number of persons) ‡</b> | Living with someone else | 0.015    | 0.009;0.022   | <0.001*  |
|                                            | Live alone               | 1.0      |               |          |
| <b>BMI, kg/m2</b>                          | ≥35                      | -0.030   | -0.040;-0.021 | <0.001*  |
|                                            | 30 to <35                | -0.015   | -0.022;-0.008 | <0.001*  |
|                                            | 25 to <30                | -0.003   | -0.009;0.003  | 0.367    |
|                                            | <25                      | 1.0      |               |          |
| <b>Comorbidities §</b>                     | score >0                 | -0.023   | -0.028;-0.018 | <0.001*  |
|                                            | score 0                  | 1.0      |               |          |
| <b>Physical activity, PASE</b>             | 0-90                     | -0.026   | -0.032;-0.020 | <0.001*  |
|                                            | 91-134                   | -0.013   | -0.019;-0.008 | <0.001*  |
|                                            | 135-175                  | -0.004   | -0.009;0.002  | 0.211    |
|                                            | 176-237                  | -0.003   | -0.008;0.002  | 0.297    |
|                                            | 238-580                  | 1.0      |               |          |
| <b>Smoking status</b>                      | Current                  | -0.030   | -0.041;-0.020 | <0.001*  |
|                                            | Former                   | -0.005   | -0.011;0.000  | 0.073    |
|                                            | Never                    | 1.0      |               |          |
| <b>Knee injuries</b>                       | Yes                      | -0.020   | -0.026;-0.014 | <0.001*  |
|                                            | No                       | 1.0      |               |          |
| <b>Knee surgical history</b>               | Yes                      | 0.005    | -0.002;0.012  | 0.164    |
|                                            | No                       | 1.0      |               |          |

\*The difference is significant at the  $p < 0.05$  level

† K-L grade  $\geq 2$  and knee pain on more than half the days during past month in the same knee

‡ The highest grade of school completed: tertiary (graduate degree), secondary (college graduate or some graduate school), and primary/none level (less than college)

§ Physical activity PASE score quintiles (higher scores indicate greater physical activity)

**Table S8** Parameter estimates from GEE-analyses, K-L grade  $\geq 2$  (2-scale)

| Parameter                                      | Category                 | B      | 95% CI        | p       |
|------------------------------------------------|--------------------------|--------|---------------|---------|
| <b>K-L grade <math>\geq 2</math> (2-scale)</b> | Yes, uni- or bilateral   | -0.006 | -0.012;0.000  | 0.040*  |
|                                                | No                       | 1.0    |               |         |
| <b>Age, years</b>                              | >65                      | 0.017  | 0.011;0.024   | <0.001* |
|                                                | 55-64                    | 0.007  | 0.001;0.012   | 0.027*  |
|                                                | 45-54                    | 1.0    |               |         |
| <b>Gender</b>                                  | Female                   | -0.013 | -0.020;-0.007 | <0.001* |
|                                                | Male                     | 1.0    |               |         |
| <b>Race</b>                                    | Other                    | -0.015 | -0.024;-0.006 | 0.001*  |
|                                                | White or Caucasian       | 1.0    |               |         |
| <b>Education ‡</b>                             | None / Primary           | -0.035 | -0.043;-0.028 | <0.001* |
|                                                | Secondary                | -0.010 | -0.018;-0.003 | 0.004*  |
|                                                | Tertiary                 | 1.0    |               |         |
| <b>Living status (number of persons)</b>       | Living with someone else | 0.015  | 0.008;0.021   | <0.001* |
|                                                | Live alone               | 1.0    |               |         |
| <b>BMI, kg/m<sup>2</sup></b>                   | $\geq 35$                | -0.034 | -0.044;-0.025 | <0.001* |
|                                                | 30 to <35                | -0.018 | -0.025;-0.010 | <0.001* |
|                                                | 25 to <30                | -0.004 | -0.010;0.002  | 0.215   |
|                                                | <25                      | 1.0    |               |         |
| <b>Comorbidities</b>                           | score >0                 | -0.023 | -0.028;-0.017 | <0.001* |
|                                                | score 0                  | 1.0    |               |         |
| <b>Physical activity, PASE §</b>               | 0-90                     | -0.026 | -0.032;-0.020 | <0.001* |
|                                                | 91-134                   | -0.013 | -0.019;-0.007 | <0.001* |
|                                                | 135-175                  | -0.004 | -0.009;0.002  | 0.206   |
|                                                | 176-237                  | -0.003 | -0.008;0.002  | 0.221   |
|                                                | 238-580                  | 1.0    |               |         |
| <b>Smoking status</b>                          | Current                  | -0.030 | -0.041;-0.020 | <0.001* |
|                                                | Former                   | -0.005 | -0.011;0.000  | 0.074   |
|                                                | Never                    | 1.0    |               |         |
| <b>Knee injuries</b>                           | Yes                      | -0.020 | -0.026;-0.014 | <0.001* |
|                                                | No                       | 1.0    |               |         |
| <b>Knee surgical history</b>                   | Yes                      | 0.002  | -0.006;0.009  | 0.651   |
|                                                | No                       | 1.0    |               |         |

\*The difference is significant at the  $p < 0.05$  level

† K-L grade  $\geq 2$  and knee pain on more than half the days during past month in the same knee

‡ The highest grade of school completed: tertiary (graduate degree), secondary (college graduate or some graduate school), and primary/none level (less than college)

§ Physical activity PASE score quintiles (higher scores indicate greater physical activity)

**Table S9** Parameter estimates from GEE-analyses, K–L grade  $\geq 2$  (3-scale)

| Parameter                                      | Category                 | B      | 95% CI        | p       |
|------------------------------------------------|--------------------------|--------|---------------|---------|
| <b>K-L grade <math>\geq 2</math> (3-scale)</b> | Yes, bilateral           | -0.013 | -0.020;-0.006 | <0.001* |
|                                                | Yes, unilateral          | -0.001 | -0.007;0.005  | 0.774   |
|                                                | No                       | 1.0    |               |         |
| <b>Age, years</b>                              | >65                      | 0.018  | 0.012;0.025   | <0.001* |
|                                                | 55–64                    | 0.007  | 0.001;0.013   | 0.019*  |
|                                                | 45–54                    | 1.0    |               |         |
| <b>Gender</b>                                  | Female                   | -0.013 | -0.019;-0.006 | <0.001* |
|                                                | Male                     | 1.0    |               |         |
| <b>Race</b>                                    | Other                    | -0.014 | -0.023;-0.005 | 0.002*  |
|                                                | White or Caucasian       | 1.0    |               |         |
| <b>Education ‡</b>                             | None / Primary           | -0.035 | -0.042;-0.027 | <0.001* |
|                                                | Secondary                | -0.010 | -0.018;-0.003 | 0.004*  |
|                                                | Tertiary                 | 1.0    |               |         |
| <b>Living status (number of persons)</b>       | Living with someone else | 0.015  | 0.008;0.021   | <0.001* |
|                                                | Live alone               | 1.0    |               |         |
| <b>BMI, kg/m<sup>2</sup></b>                   | $\geq 35$                | -0.033 | -0.042;-0.023 | <0.001* |
|                                                | 30 to <35                | -0.017 | -0.024;-0.010 | <0.001* |
|                                                | 25 to <30                | -0.004 | -0.010;0.003  | 0.253   |
|                                                | <25                      | 1.0    |               |         |
| <b>Comorbidities</b>                           | score >0                 | -0.023 | -0.028;-0.017 | <0.001* |
|                                                | score 0                  | 1.0    |               |         |
| <b>Physical activity, PASE §</b>               | 0–90                     | -0.026 | -0.032;-0.020 | <0.001* |
|                                                | 91–134                   | -0.013 | -0.019;-0.007 | <0.001* |
|                                                | 135–175                  | -0.004 | -0.009;0.002  | 0.208   |
|                                                | 176–237                  | -0.003 | -0.008;0.002  | 0.212   |
|                                                | 238–580                  | 1.0    |               |         |
| <b>Smoking status</b>                          | Current                  | -0.030 | -0.041;-0.020 | <0.001* |
|                                                | Former                   | -0.005 | -0.011;0.000  | 0.067   |
|                                                | Never                    | 1.0    |               |         |
| <b>Knee injuries</b>                           | Yes                      | -0.020 | -0.026;-0.014 | <0.001* |
|                                                | No                       | 1.0    |               |         |
| <b>Knee surgical history</b>                   | Yes                      | 0.002  | -0.005;0.009  | 0.600   |
|                                                | No                       | 1.0    |               |         |

\*The difference is significant at the  $p < 0.05$  level

† K-L grade  $\geq 2$  and knee pain on more than half the days during past month in the same knee

‡ The highest grade of school completed: tertiary (graduate degree), secondary (college graduate or some graduate school), and primary/none level (less than college)

§ Physical activity PASE score quintiles (higher scores indicate greater physical activity)

**Table S10** Parameter estimates from GEE-analyses, the highest K-L grade

| Parameter                                | Category                 | B      | 95% CI        | p       |
|------------------------------------------|--------------------------|--------|---------------|---------|
| <b>The highest K-L grade</b>             | 4                        | -0.027 | -0.037;-0.016 | <0.001* |
|                                          | 3                        | -0.008 | -0.017;0.000  | 0.055   |
|                                          | 2                        | -0.004 | -0.011;0.004  | 0.349   |
|                                          | 1                        | -0.002 | -0.011;0.007  | 0.706   |
|                                          | 0                        | 1.0    |               |         |
| <b>Age, years</b>                        | >65                      | 0.019  | 0.012;0.026   | <0.001* |
|                                          | 55-64                    | 0.007  | 0.001;0.013   | 0.016*  |
|                                          | 45-54                    | 1.0    |               |         |
| <b>Gender</b>                            | Female                   | -0.014 | -0.021;-0.007 | <0.001* |
|                                          | Male                     | 1.0    |               |         |
| <b>Race</b>                              | Other                    | -0.015 | -0.024;-0.007 | 0.001*  |
|                                          | White or Caucasian       | 1.0    |               |         |
| <b>Education ‡</b>                       | None / Primary           | -0.035 | -0.042;-0.028 | <0.001* |
|                                          | Secondary                | -0.011 | -0.018;-0.003 | 0.004*  |
|                                          | Tertiary                 | 1.0    |               |         |
| <b>Living status (number of persons)</b> | Living with someone else | 0.015  | 0.008;0.021   | <0.001* |
|                                          | Live alone               | 1.0    |               |         |
| <b>BMI, kg/m2</b>                        | ≥35                      | -0.033 | -0.043;-0.024 | <0.001* |
|                                          | 30 to <35                | -0.017 | -0.024;-0.010 | <0.001* |
|                                          | 25 to <30                | -0.004 | -0.010;0.003  | 0.248   |
|                                          | <25                      | 1.0    |               |         |
| <b>Comorbidities</b>                     | score >0                 | -0.023 | -0.028;-0.017 | <0.001* |
|                                          | score 0                  | 1.0    |               |         |
| <b>Physical activity, PASE §</b>         | 0-90                     | -0.026 | -0.032;-0.020 | <0.001* |
|                                          | 91-134                   | -0.013 | -0.018;-0.007 | <0.001* |
|                                          | 135-175                  | -0.003 | -0.009;0.002  | 0.232   |
|                                          | 176-237                  | -0.003 | -0.008;0.002  | 0.266   |
|                                          | 238-580                  | 1.0    |               |         |
| <b>Smoking status</b>                    | Current                  | -0.031 | -0.042;-0.020 | <0.001* |
|                                          | Former                   | -0.005 | -0.011;0.000  | 0.070   |
|                                          | Never                    | 1.0    |               |         |
| <b>Knee injuries</b>                     | Yes                      | -0.019 | -0.025;-0.013 | <0.001* |
|                                          | No                       | 1.0    |               |         |
| <b>Knee surgical history</b>             | Yes                      | 0.004  | -0.003;0.012  | 0.253   |
|                                          | No                       | 1.0    |               |         |

\*The difference is significant at the  $p < 0.05$  level

† K-L grade  $\geq 2$  and knee pain on more than half the days during past month in the same knee

‡ The highest grade of school completed: tertiary (graduate degree), secondary (college graduate or some graduate school), and primary/none level (less than college)

§ Physical activity PASE score quintiles (higher scores indicate greater physical activity)

**Table S11** Parameter estimates from GEE-analyses, mean of K-L grades

| Parameter                                | Category                 | B      | 95% CI        | p       |
|------------------------------------------|--------------------------|--------|---------------|---------|
| <b>Mean of K-L grades</b>                | 4.0                      | -0.040 | -0.063;-0.018 | 0.001*  |
|                                          | 3.5                      | -0.036 | -0.049;-0.023 | <0.001* |
|                                          | 3.0                      | -0.019 | -0.030;-0.008 | 0.001*  |
|                                          | 2.5                      | -0.008 | -0.018;0.002  | 0.118   |
|                                          | 2.0                      | -0.012 | -0.021;-0.004 | 0.004*  |
|                                          | 1.5                      | -0.003 | -0.011;0.006  | 0.554   |
|                                          | 1.0                      | 0.004  | -0.005;0.013  | 0.375   |
|                                          | 0.5                      | -0.002 | -0.013;0.008  | 0.651   |
|                                          | 0.0                      | 1.0    |               |         |
| <b>Age, years</b>                        | >65                      | 0.020  | 0.013;0.027   | <0.001* |
|                                          | 55-64                    | 0.008  | 0.002;0.014   | 0.011*  |
|                                          | 45-54                    | 1.0    |               |         |
| <b>Gender</b>                            | Female                   | -0.013 | -0.020;-0.007 | <0.001* |
|                                          | Male                     | 1.0    |               |         |
| <b>Race</b>                              | Other                    | -0.014 | -0.022;-0.005 | 0.002*  |
|                                          | White or Caucasian       | 1.0    |               |         |
| <b>Education ‡</b>                       | None / Primary           | -0.035 | -0.042;-0.027 | <0.001* |
|                                          | Secondary                | -0.010 | -0.018;-0.003 | 0.005*  |
|                                          | Tertiary                 | 1.0    |               |         |
| <b>Living status (number of persons)</b> | Living with someone else | 0.015  | 0.008;0.021   | <0.001* |
|                                          | Live alone               | 1.0    |               |         |
| <b>BMI, kg/m<sup>2</sup></b>             | ≥35                      | -0.032 | -0.041;-0.022 | <0.001* |
|                                          | 30 to <35                | -0.016 | -0.023;-0.009 | <0.001* |
|                                          | 25 to <30                | -0.003 | -0.009;0.003  | 0.296   |
|                                          | <25                      | 1.0    |               |         |
| <b>Comorbidities</b>                     | score >0                 | -0.023 | -0.028;-0.017 | <0.001* |
|                                          | score 0                  | 1.0    |               |         |
| <b>Physical activity, PASE §</b>         | 0-90                     | -0.026 | -0.032;-0.020 | <0.001* |
|                                          | 91-134                   | -0.013 | -0.018;-0.007 | <0.001* |
|                                          | 135-175                  | -0.004 | -0.009;0.002  | 0.206   |
|                                          | 176-237                  | -0.003 | -0.008;0.002  | 0.250   |
|                                          | 238-580                  | 1.0    |               |         |
| <b>Smoking status</b>                    | Current                  | -0.031 | -0.041;-0.020 | <0.001* |
|                                          | Former                   | -0.005 | -0.011;0.000  | 0.058   |
|                                          | Never                    | 1.0    |               |         |
| <b>Knee injuries</b>                     | Yes                      | -0.019 | -0.025;-0.013 | <0.001* |
|                                          | No                       | 1.0    |               |         |
| <b>Knee surgical history</b>             | Yes                      | 0.004  | -0.004;0.012  | 0.295   |
|                                          | No                       | 1.0    |               |         |

\*The difference is significant at the p<0.05 level

† K-L grade ≥2 and knee pain on more than half the days during past month in the same knee

‡ The highest grade of school completed: tertiary (graduate degree), secondary (college graduate or some graduate school), and primary/none level (less than college)

§ Physical activity PASE score quintiles (higher scores indicate greater physical activity)



**Table S12** Parameter estimates from GEE-analyses, combination of K-L grades

| <b>Parameter</b>                         | <b>Category</b>          | <b>B</b> | <b>95% CI</b> | <b>p</b> |
|------------------------------------------|--------------------------|----------|---------------|----------|
| <b>Combination of K-L grades</b>         | (4;4)                    | -0.040   | -0.063;-0.017 | 0.001*   |
|                                          | (4;3)                    | -0.036   | -0.049;-0.023 | <0.001*  |
|                                          | (4;2)                    | -0.021   | -0.036;-0.005 | 0.012*   |
|                                          | (4;1)                    | -0.011   | -0.035;0.013  | 0.375    |
|                                          | (4;0)                    | -0.028   | -0.050;-0.007 | 0.010*   |
|                                          | (3;3)                    | -0.018   | -0.030;-0.006 | 0.003*   |
|                                          | (3;2)                    | -0.008   | -0.018;0.003  | 0.152    |
|                                          | (3;1)                    | -0.009   | -0.023;0.005  | 0.196    |
|                                          | (3;0)                    | -0.002   | -0.016;0.011  | 0.741    |
|                                          | (2;2)                    | -0.011   | -0.021;-0.002 | 0.015*   |
|                                          | (2;1)                    | -0.003   | -0.013;0.006  | 0.476    |
|                                          | (2;0)                    | 0.006    | -0.004;0.016  | 0.217    |
|                                          | (1;1)                    | 0.000    | -0.012;0.013  | 0.969    |
|                                          | (1;0)                    | -0.002   | -0.012;0.008  | 0.674    |
| (0;0)                                    | 1.0                      |          |               |          |
| <b>Age, years</b>                        | >65                      | 0.020    | 0.013;0.027   | <0.001*  |
|                                          | 55-64                    | 0.008    | 0.002;0.014   | 0.011*   |
|                                          | 45-54                    | 1.0      |               |          |
| <b>Gender</b>                            | Female                   | -0.013   | -0.020;-0.007 | <0.001*  |
|                                          | Male                     | 1.0      |               |          |
| <b>Race</b>                              | Other                    | -0.014   | -0.023;-0.005 | 0.002*   |
|                                          | White or Caucasian       | 1.0      |               |          |
| <b>Education ‡</b>                       | None / Primary           | -0.035   | -0.042;-0.027 | <0.001*  |
|                                          | Secondary                | -0.010   | -0.018;-0.003 | 0.004*   |
|                                          | Tertiary                 | 1.0      |               |          |
| <b>Living status (number of persons)</b> | Living with someone else | 0.015    | 0.008;0.021   | <0.001*  |
|                                          | Live alone               | 1.0      |               |          |
| <b>BMI, kg/m2</b>                        | ≥35                      | -0.032   | -0.041;-0.023 | <0.001*  |
|                                          | 30 to <35                | -0.016   | -0.024;-0.009 | <0.001*  |
|                                          | 25 to <30                | -0.003   | -0.010;0.003  | 0.286    |
|                                          | <25                      | 1.0      |               |          |
| <b>Comorbidities</b>                     | score >0                 | -0.023   | -0.028;-0.017 | <0.001*  |
|                                          | score 0                  | 1.0      |               |          |
| <b>Physical activity, PASE §</b>         | 0-90                     | -0.026   | -0.032;-0.019 | <0.001*  |
|                                          | 91-134                   | -0.013   | -0.018;-0.007 | <0.001*  |
|                                          | 135-175                  | -0.003   | -0.009;0.002  | 0.220    |
|                                          | 176-237                  | -0.003   | -0.008;0.002  | 0.264    |
|                                          | 238-580                  | 1.0      |               |          |
| <b>Smoking status</b>                    | Current                  | -0.031   | -0.041;-0.020 | <0.001*  |
|                                          | Former                   | -0.005   | -0.011;0.000  | 0.063    |
|                                          | Never                    | 1.0      |               |          |
| <b>Knee injuries</b>                     | Yes                      | -0.019   | -0.025;-0.013 | <0.001*  |
|                                          | No                       | 1.0      |               |          |
| <b>Knee surgical history</b>             | Yes                      | 0.004    | -0.003;0.012  | 0.272    |

**Additional file 4** Health-Related Quality of Life in Relation to Symptomatic and Radiographic Definitions of Knee Osteoarthritis: Data from Osteoarthritis Initiative (OAI) 4-Year Follow-Up Study

---

| No | 1.0 |
|----|-----|
|----|-----|

---

\*The difference is significant at the  $p < 0.05$  level

† K-L grade  $\geq 2$  and knee pain on more than half the days during past month in the same knee

‡ The highest grade of school completed: tertiary (graduate degree), secondary (college graduate or some graduate school), and primary/none level (less than college)

§ Physical activity PASE score quintiles (higher scores indicate greater physical activity)
