# Supplementary material for: Health-related quality of life in relation to symptomatic and radiographic definitions of knee osteoarthritis: data from Osteoarthritis Initiative (OAI) 4-year follow-up study
Source: Springer Nature journal article supplement (doi:10.1186/s12955-018-0979-7), 2018-07-31
Supplement: MOESM5 [file 15991850]

**Additional file 5** Health-Related Quality of Life in Relation to Symptomatic and Radiographic Definitions of Knee Osteoarthritis: Data from Osteoarthritis Initiative (OAI) 4-Year Follow-Up Study

These tables report pairwise differences between estimated marginal means of SF-6D-disutility scores from GEE-analyses.

**Table S13** Pairwise differences between estimated marginal means of SF-6D-disutility score from GEE-analyses, symptomatic OA status (2-scale), K-L grade  $\geq 2$  and knee pain on more than half the days during past month in the same knee

| <b>Symptomatic OA status</b> | <b>No</b> | <b>Yes</b> |
|------------------------------|-----------|------------|
| <b>No</b>                    |           | -0.025*    |
| <b>Yes</b>                   | 0.025*    |            |

\*The mean difference is significant at the  $p < 0.05$  level

**Table S14** Pairwise differences between estimated marginal means of SF-6D-disutility score from GEE-analyses, K-L grade  $\geq 2$  (2-scale)

| <b>K-L grade <math>\geq 2</math></b> | <b>No</b> | <b>Yes</b> |
|--------------------------------------|-----------|------------|
| <b>No</b>                            |           | -0.006*    |
| <b>Yes</b>                           | 0.006*    |            |

\*The mean difference is significant at the  $p < 0.05$  level

**Table S15** Pairwise differences between estimated marginal means of SF-6D-disutility score from GEE-analyses, symptomatic OA status (3-scale), K-L grade  $\geq 2$  and knee pain on more than half the days during past month in the same knee

| <b>Symptomatic OA status</b> | <b>No</b> | <b>Yes, unilateral</b> | <b>Yes, bilateral</b> |
|------------------------------|-----------|------------------------|-----------------------|
| <b>No</b>                    |           | -0.024*                | -0.030*               |
| <b>Yes, unilateral</b>       | 0.024*    |                        | -0.006                |
| <b>Yes, bilateral</b>        | 0.030*    | 0.006                  |                       |

\*The mean difference is significant at the  $p < 0.05$  level

**Table S16** Pairwise differences between estimated marginal means of SF-6D-disutility score from GEE-analyses, K-L grade  $\geq 2$  (3-scale)

| <b>K-L grade <math>\geq 2</math></b> | <b>No</b> | <b>Yes, unilateral</b> | <b>Yes, bilateral</b> |
|--------------------------------------|-----------|------------------------|-----------------------|
| <b>No</b>                            |           | -0.001                 | -0.013*               |
| <b>Yes, unilateral</b>               | 0.001     |                        | -0.012*               |
| <b>Yes, bilateral</b>                | 0.013*    | 0.012*                 |                       |

\*The mean difference is significant at the  $p < 0.05$  level

**Table S17** Pairwise differences between estimated marginal means of SF-6D-disutility score from GEE-analyses, the highest K-L grade

| <b>K-L grade</b> | <b>0</b> | <b>1</b> | <b>2</b> | <b>3</b> | <b>4</b> |
|------------------|----------|----------|----------|----------|----------|
| <b>0</b>         |          | -0.002   | -0.004   | -0.008   | -0.027*  |
| <b>1</b>         | 0.002    |          | -0.002   | -0.007   | -0.025*  |
| <b>2</b>         | 0.004    | 0.002    |          | -0.005   | -0.023*  |
| <b>3</b>         | 0.008    | 0.007    | 0.005    |          | -0.018*  |
| <b>4</b>         | 0.027*   | 0.025*   | 0.023*   | 0.018*   |          |

\*The mean difference is significant at the  $p < 0.05$  level

**Table S18** Pairwise differences between estimated marginal means of SF-6D-disutility score from GEE-analyses, mean of K-L grades

| <b>K-L grade</b> | <b>0.0</b> | <b>0.5</b> | <b>1.0</b> | <b>1.5</b> | <b>2.0</b> | <b>2.5</b> | <b>3.0</b> | <b>3.5</b> | <b>4.0</b> |
|------------------|------------|------------|------------|------------|------------|------------|------------|------------|------------|
| <b>0.0</b>       |            | -0.002     | 0.004      | -0.003     | -0.012*    | -0.008     | -0.019*    | -0.036*    | -0.040*    |
| <b>0.5</b>       | 0.002      |            | 0.006      | 0.000      | -0.010     | -0.006     | -0.017*    | -0.034*    | -0.038*    |
| <b>1.0</b>       | -0.004     | -0.006     |            | -0.007     | -0.016*    | -0.012*    | -0.023*    | -0.040*    | -0.044*    |
| <b>1.5</b>       | 0.003      | 0.000      | 0.007      |            | -0.010*    | -0.005     | -0.016*    | -0.034*    | -0.038*    |
| <b>2.0</b>       | 0.012*     | 0.010      | 0.016*     | 0.010*     |            | 0.005      | -0.006     | -0.024*    | -0.028*    |
| <b>2.5</b>       | 0.008      | 0.006      | 0.012*     | 0.005      | -0.005     |            | -0.011*    | -0.028*    | -0.032*    |
| <b>3.0</b>       | 0.019*     | 0.017*     | 0.023*     | 0.016*     | 0.006      | 0.011*     |            | -0.017*    | -0.021     |
| <b>3.5</b>       | 0.036*     | 0.034*     | 0.040*     | 0.034*     | 0.024*     | 0.028*     | 0.017*     |            | -0.004     |
| <b>4.0</b>       | 0.040*     | 0.038*     | 0.044*     | 0.038*     | 0.028*     | 0.032*     | 0.021      | 0.004      |            |

\*The mean difference is significant at the  $p < 0.05$  level

**Table S19** Pairwise differences between estimated marginal means of SF-6D-disutility score from GEE-analyses, combination of K-L grades

| <b>K-L grades</b> | <b>(0;0)</b> | <b>(1;0)</b> | <b>(1;1)</b> | <b>(2;0)</b> | <b>(2;1)</b> | <b>(2;2)</b> | <b>(3;0)</b> | <b>(3;1)</b> | <b>(3;2)</b> | <b>(3;3)</b> | <b>(4;0)</b> | <b>(4;1)</b> | <b>(4;2)</b> | <b>(4;3)</b> | <b>(4;4)</b> |
|-------------------|--------------|--------------|--------------|--------------|--------------|--------------|--------------|--------------|--------------|--------------|--------------|--------------|--------------|--------------|--------------|
| <b>(0;0)</b>      |              | -0.002       | 0.000        | 0.006        | -0.003       | -0.012*      | -0.002       | -0.009       | -0.008       | -0.018*      | -0.028*      | -0.011       | -0.021*      | -0.036*      | -0.040*      |
| <b>(1;0)</b>      | 0.002        |              | 0.002        | 0.008        | -0.001       | -0.009       | 0.000        | -0.007       | -0.005       | -0.016*      | -0.026*      | -0.009       | -0.018*      | -0.034*      | -0.038*      |
| <b>(1;1)</b>      | 0.000        | -0.002       |              | 0.006        | -0.004       | -0.012       | -0.003       | -0.009       | -0.008       | -0.018*      | -0.029*      | -0.011       | -0.021*      | -0.036*      | -0.040*      |
| <b>(2;0)</b>      | -0.006       | -0.008       | -0.006       |              | -0.010       | -0.018*      | -0.008       | -0.015*      | -0.014*      | -0.024*      | -0.034*      | -0.017       | -0.027*      | -0.042*      | -0.046*      |
| <b>(2;1)</b>      | 0.003        | 0.001        | 0.004        | 0.010        |              | -0.008       | 0.001        | -0.006       | -0.004       | -0.015*      | -0.025*      | -0.007       | -0.017*      | -0.033*      | -0.037*      |
| <b>(2;2)</b>      | 0.012*       | 0.009        | 0.012        | 0.018*       | 0.008        |              | 0.009        | 0.002        | 0.004        | -0.007       | -0.017       | 0.001        | -0.009       | -0.025*      | -0.029*      |
| <b>(3;0)</b>      | 0.002        | 0.000        | 0.003        | 0.008        | -0.001       | -0.009       |              | -0.007       | -0.005       | -0.016*      | -0.026*      | -0.008       | -0.018       | -0.034*      | -0.038*      |
| <b>(3;1)</b>      | 0.009        | 0.007        | 0.009        | 0.015*       | 0.006        | -0.002       | 0.007        |              | 0.002        | -0.009       | -0.019       | -0.002       | -0.011       | -0.027*      | -0.031*      |
| <b>(3;2)</b>      | 0.008        | 0.005        | 0.008        | 0.014*       | 0.004        | -0.004       | 0.005        | -0.002       |              | -0.011       | -0.021       | -0.003       | -0.013       | -0.029*      | -0.033*      |
| <b>(3;3)</b>      | 0.018*       | 0.016*       | 0.018*       | 0.024*       | 0.015*       | 0.007        | 0.016*       | 0.009        | 0.011        |              | -0.010       | 0.007        | -0.002       | -0.018*      | -0.022*      |
| <b>(4;0)</b>      | 0.028*       | 0.026*       | 0.029*       | 0.034*       | 0.025*       | 0.017        | 0.026*       | 0.019        | 0.021        | 0.010        |              | 0.018        | 0.008        | -0.008       | -0.012       |
| <b>(4;1)</b>      | 0.011        | 0.009        | 0.011        | 0.017        | 0.007        | -0.001       | 0.008        | 0.002        | 0.003        | -0.007       | -0.018       |              | -0.010       | -0.025       | -0.029       |
| <b>(4;2)</b>      | 0.021*       | 0.018*       | 0.021*       | 0.027*       | 0.017*       | 0.009        | 0.018        | 0.011        | 0.013        | 0.002        | -0.008       | 0.010        |              | -0.016       | -0.020       |
| <b>(4;3)</b>      | 0.036*       | 0.034*       | 0.036*       | 0.042*       | 0.033*       | 0.025*       | 0.034*       | 0.027*       | 0.029*       | 0.018*       | 0.008        | 0.025        | 0.016        |              | -0.004       |
| <b>(4;4)</b>      | 0.040*       | 0.038*       | 0.040*       | 0.046*       | 0.037*       | 0.029*       | 0.038*       | 0.031*       | 0.033*       | 0.022*       | 0.012        | 0.029        | 0.020        | 0.004        |              |

\*The mean difference is significant at the p<0.05 level
